# Supplementary material for: Impact of agricultural farms on the environment of the Puck Commune: Integrated agriculture calculator—CalcGosPuck
Source: PeerJ. 2019 Feb 19;7:e6478. doi: 10.7717/peerj.6478 (PMC6385684; doi:10.7717/peerj.6478)
Supplement: Supplemental Information 1 [file peerj-07-6478-s001.xls]

## Sheet: Basic information
ADDITIONAL DATA	1	2	3	4	5	6	7	8	9	10	11	12	13	14	15	16	17	18	19	20	21	22	23	24	25	26	27	28	29	30	31
Area of the farm (ha)	48	92.8	81	17.3	51.52	16	38.23	56.2	70	29.5	18	130	43	10.5	100	8.5	21.5	77.5	120	45	15	62	36	7.24	16.26	118	19	38	16.5	5	13	1420.55	0.0322581	0.354839	0.258065	0.354839
Size structure: <=5 , (5;20> , (20;50> , >50;	(20;50>	>50	>50	(5;20>	>50	(5;20>	(20;50>	>50	>50	(20;50>	(5;20>	>50	(20;50>	(5;20>	>50	(5;20>	(20;50>	>50	>50	(20;50>	(5;20>	>50	(20;50>	(5;20>	(5;20>	>50	(5;20>	(20;50>	(5;20>	<=5	(5;20>	1420.55	to 5 ha	from 5 to 20 ha	from 20 to 50 ha	from 50 ha
The area of the individual land categories																																sum/total
arable land	17	38.27	33	16.1	48.22	9.6	29.67	56	20	9.5	14	130	43	10	50	7.23	7.5	76.5	80	40	11.5	51	25.5	4.45	16.06	65	10	16	5.88	5	8.5	954.48	0.671909
permanent crops (orchards)	0	54.53	0	0	0	0	0	0	0	0	0	0	0	0	0	0	0	0	0	0	0	0	0	0	0	0	0	0	0	0	0	54.53	0.0383865
permanent meadows	31	0	48	0	1	3	6.19	0.2	40	15	2	0	0	0.5	47.5	1.27	14	0	40	3	3.5	7	5.5	2.79	0	53	5	20	10.62	0	3.5	363.57	0.255936
permanent pastures	0	0	0	1.2	0	3.4	0	0	10	5	1.5	0	0	0	0	0	0	0	0	2	0	4	3	0	0.2	0	2	0	0	0	0	32.3	0.0227377
fallow land	0	0	0	0	2.3	0	0.77	0	0	0	0	0	0	0	2.5	0	0	1	0	0	0	0	0	0	0	0	1	2	0	0	1	10.57	0.00744078
others	0	0	0	0	0	0	1.6	0	0	0	0.5	0	0	0	0	0	0	0	0	0	0	0	2	0	0	0	1	0	0	0	0	5.1	0.00359016
Soil type	medium heavy	light	medium heavy	medium heavy	medium heavy	medium heavy	medium heavy	medium heavy	medium heavy	light	medium heavy	medium heavy	light	medium heavy	medium heavy	medium heavy	medium heavy	medium heavy	medium heavy	medium heavy	medium heavy	medium heavy	medium heavy	medium heavy	medium heavy	medium heavy	medium heavy	medium heavy	medium heavy	medium heavy	medium heavy	0	0	0		1	0
Plant production operating	YES	YES	YES	YES	YES	YES	YES	YES	YES	YES	YES	YES	YES	YES	YES	YES	YES	YES	YES	YES	YES	YES	YES	YES	YES	YES	YES	YES	YES	YES	YES	0	0	0	31	31	0
Area of the farm (ha)	48	92.8	81	17.3	51.52	16	38.23	56.2	70	29.5	18	130	43	10.5	100	8.5	21.5	77.5	120	45	15	62	36	7.24	16.26	118	19	38	16.5	5	13	light	medium heavy	heavy	sum	YES	NO
Size structure: <=5 , (5;10> , (10;15> , (15;20> , (20;50> , >50	(20;50>	>50	>50	(15;20>	>50	(15;20>	(20;50>	>50	>50	(20;50>	(15;20>	>50	(20;50>	(10;15>	>50	(5;10>	(20;50>	>50	>50	(20;50>	(10;15>	>50	(20;50>	(5;10>	(15;20>	>50	(15;20>	(20;50>	(15;20>	<=5	(10;15>	0.0322581	0.0645161	0.0967742	0.193548	0.258065	0.354839
																																to 5 ha	from 5 to 10 ha	from 10 to 15 ha	from 15 to 20 ha	from 20 to 50 ha	from 50 ha
																																animals	YES	0.806452	25
																																	NO	0.193548	6
																																very small (<5 ha)	small (5-10 ha)	medium-small (10-20 ha)	medium-large (20-30 ha)	large (30-50 ha)	very large (>50 ha)
																															1	0.0322581	0.0645161	0.290323	0.0645161	0.193548	0.354839
																																to 5 ha	from 5 to 10 ha	from 10 to 20 ha	from 20 to 30 ha	from 30 to 50 ha	from 50 ha

## Sheet: SILAGE
	1	2	3	4	5	6	7	8	9	10	11	12	13	14	15	16	17	18	19	20	21	22	23	24	25	26	27	28	29	30	31	applicable	N/A - not applicable	applicable	N/A - not applicable	total
5.0.38 Is the silage stored? If yes - how?																																0.580645	0.419355	18	13	31
in bunker silos	-	-	-	-	-	-	-	-	-	-	1	-	-	-	-	-	-	-	-	-	-	-	-	-	-	-	-	-	1	-	-	0.0645161		2
on impermeable floor	-	-	-	-	-	-	-	-	-	-	-	-	-	-	-	-	-	-	-	-	-	-	-	-	-	-	-	-	-	-	-	0		0
in stretchable plastic bags or socks	-	-	-	-	-	-	-	-	-	-	-	-	-	-	-	-	-	-	-	-	-	-	-	-	-	-	1	-	-	-	-	0.0322581		1
on foil and chaff base	-	-	-	-	-	-	-	-	-	1	-	-	-	-	-	-	-	-	1	1	-	-	-	-	-	-	-	-	-	-	-	0.0967742		3
in round bales	1	-	1	1	1	1	1	-	1	1	-	-	-	-	1	-	-	-	1	1	-	1	1	-	-	1	-	1	1	-	-	0.516129		16
directly on the ground	1	-	1	-	-	-	-	-	1	-	1	-	-	-	1	-	-	-	-	-	-	1	1	-	-	1	-	1	-	-	-	0.290323		9
N/A (in case when the silage is not beeing produced or used on the farm)	-	1	-	-	-	-	-	1	-	-	-	1	1	1	-	1	1	1	-	-	1	-	-	1	1	-	-	-	-	1	1	31	SUM	13
5.0.39 Is the silage storage place located in a distance bigger then 20 m from the edge of the surface water and from the water sources and intakes	YES	-	YES	YES	YES	YES	YES	-	YES	YES	YES	-	-	-	YES	-	-	-	YES	YES	-	YES	YES	-	-	YES	YES	YES	YES	-	-	0	0	31
ADDITIONAL DATA	1	2	3	4	5	6	7	8	9	10	11	12	13	14	15	16	17	18	19	20	21	22	23	24	25	26	27	28	29	30	31
Farm's area (ha)	48	92.8	81	17.3	51.52	16	38.23	56.2	70	29.5	18	130	43	10.5	100	8.5	21.5	77.5	120	45	15	62	36	7.24	16.26	118	19	38	16.5	5	13
Size structure: <5 , (5;20> , (20;50> , >50;	(20;50>	>50	>50	(5;20>	>50	(5;20>	(20;50>	>50	>50	(20;50>	(5;20>	>5	(20;50>	(5;20>	>50	(5;20>	(20;50>	>50	>50	(20;50>	(5;20>	>50	(20;50>	(5;20>	(5;20>	>50	(5;20>	(20;50>	(5;20>	<5	(5;20>
Animals/Livestock	cattle	-	cattle	pigs, poultry	calves, pigs, poultry	cattle, pigs	cattle, pigs, poultry	-	cattle, pigs, poultry	cattle, poultry	cattle, pigs	-	pigs	pigs	pigs	-	-	pigs	cattle	cattle, poultry	pigs	cattle, poultry	cattle, poultry	pigs, poultry	-	cattle, poultry	cattle, pigs, poultry	cattle	cattle	pigs, poultry	cattle, pigs
Animals maintanance system on the farm	shallow litter	-	shallow litter	shallow litter	shallow litter	shallow litter	shallow litter (deep - calves)	-	shallow litter	shallow litter	shallow litter	-	shallow litter	shallow litter	shallow litter	-	-	litter free - (shallow - sows)	shallow litter	shallow litter	shallow litter	shallow litter	shallow litter	shallow litter	-	shallow litter	shallow litter	shallow litter	deep litter (shallow - cows)	shallow litter	deep litter
in bunker silos	2
in stretchable plastic bags or socks	1
on foil and chaff base	3
in round bales	16
directly on the ground	9
